# Supplementary material for: A novel turn-on Schiff-base fluorescent sensor for aluminum(iii) ions in living cells
Source: Royal Society of Chemistry journal article supplement (doi:10.1039/c5ra17557g), 2015-01-01
Supplement: c5ra17557g1.pdf [file c5ra17557g1.pdf]

# A novel turn-on Schiff-base fluorescent sensor for Aluminum (III) ions in living cells

Jianfei Tian, Xiaxia Yan, Hui Yang, Fuli Tian\*

College of Chemistry and Chemical Engineering, Inner Mongolia

University, Hohhot 010000, PR China

ftian@imu.edu.cn

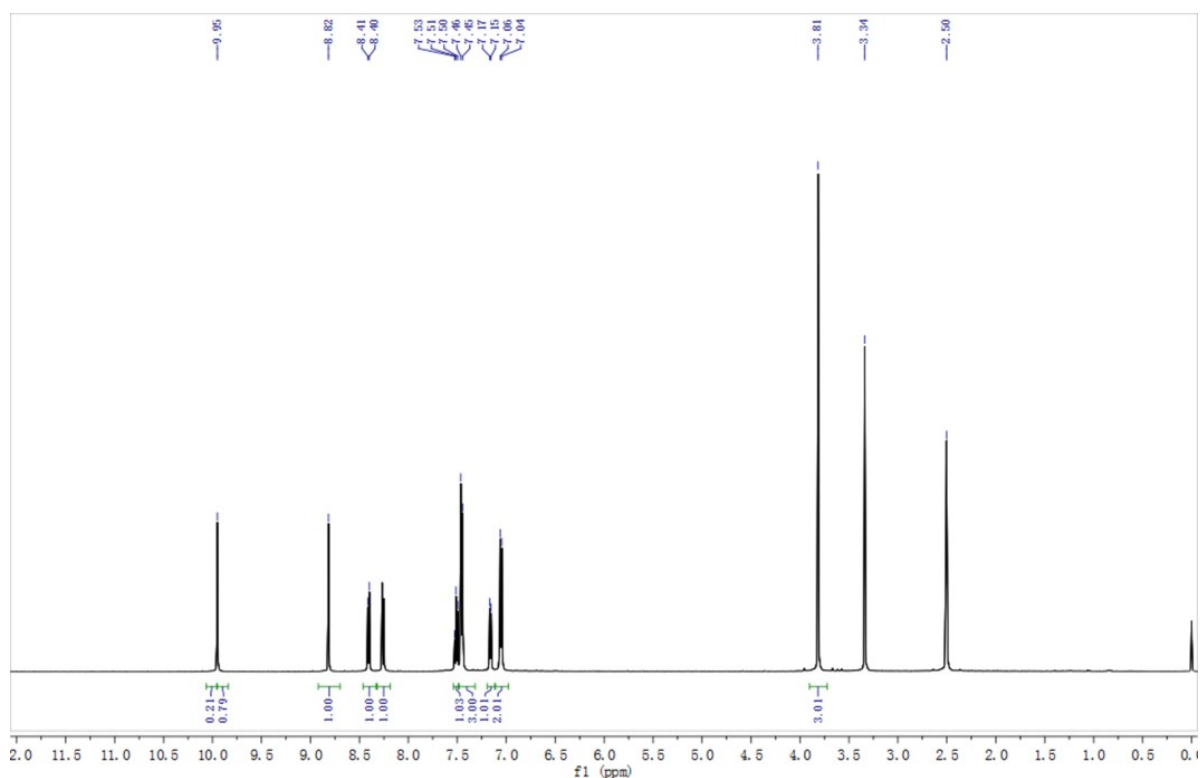

Fig. S1  $^1\text{H}$  NMR (500MHz) spectra of compound L

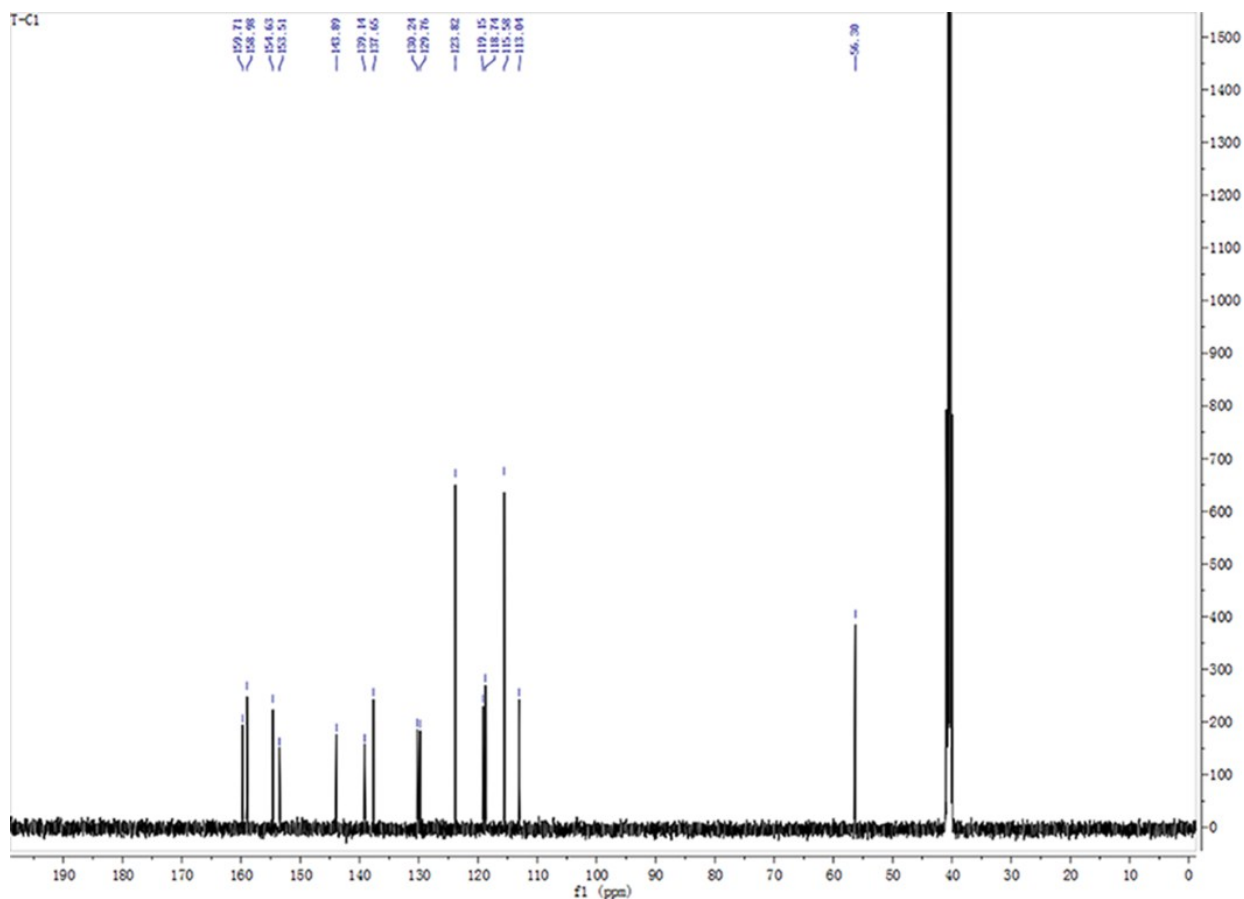

Fig.S2  $^{12}\text{C}$  NMR (500MHz) spectra of compound L

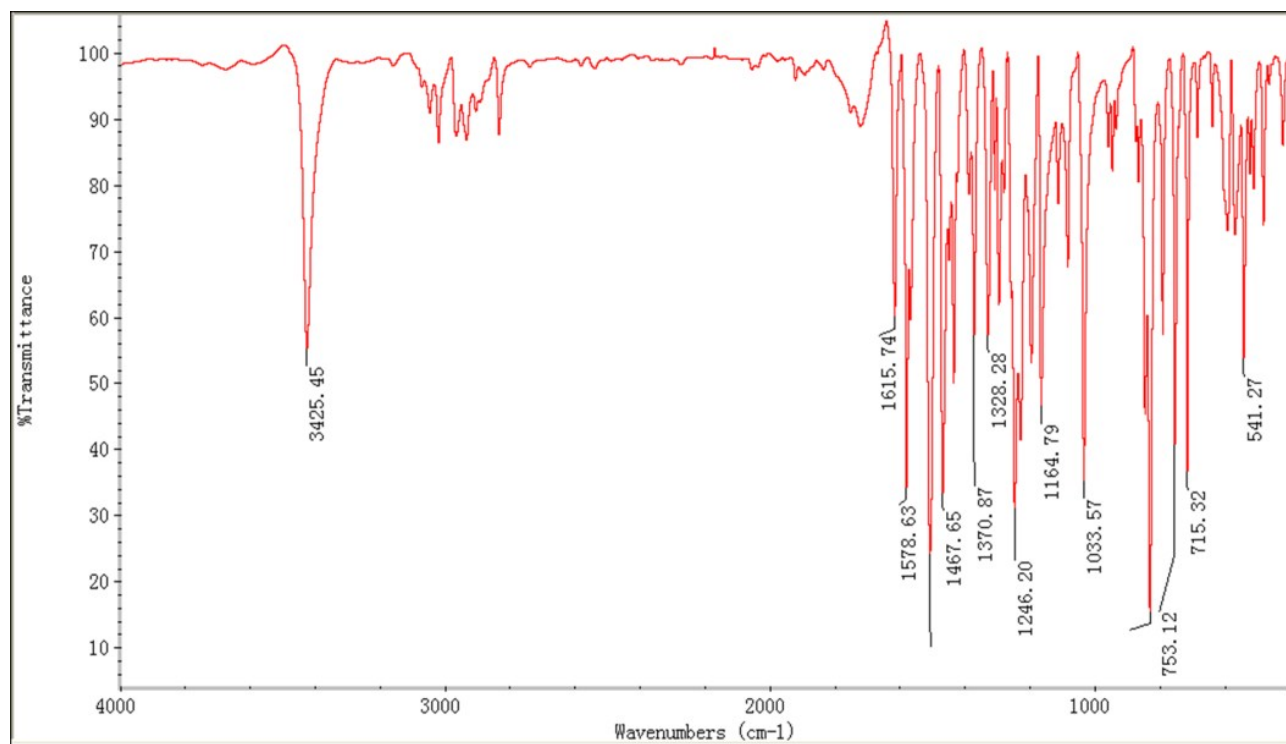

Fig. S3 IR spectra of compound L

ANGYUTIAN1 #21-30 RT: 0.41-0.52 AV: 10 SB: 17 0.02-0.31 , 0.55-0.70 NL: 1.30E7  
+ c ESI Full ms [150.00-800.00]

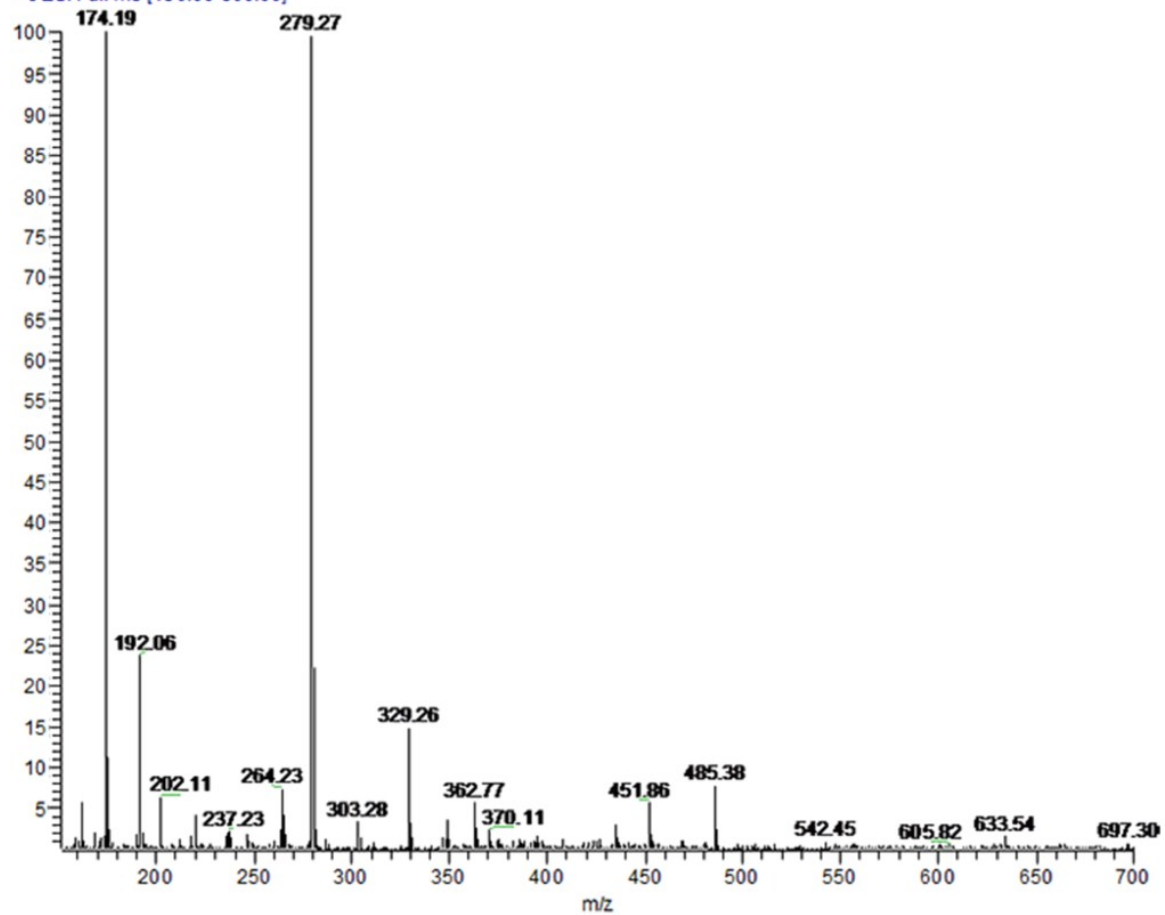

Fig. S4 The electrospray ionization mass spectra (ESI-MS) of compound L

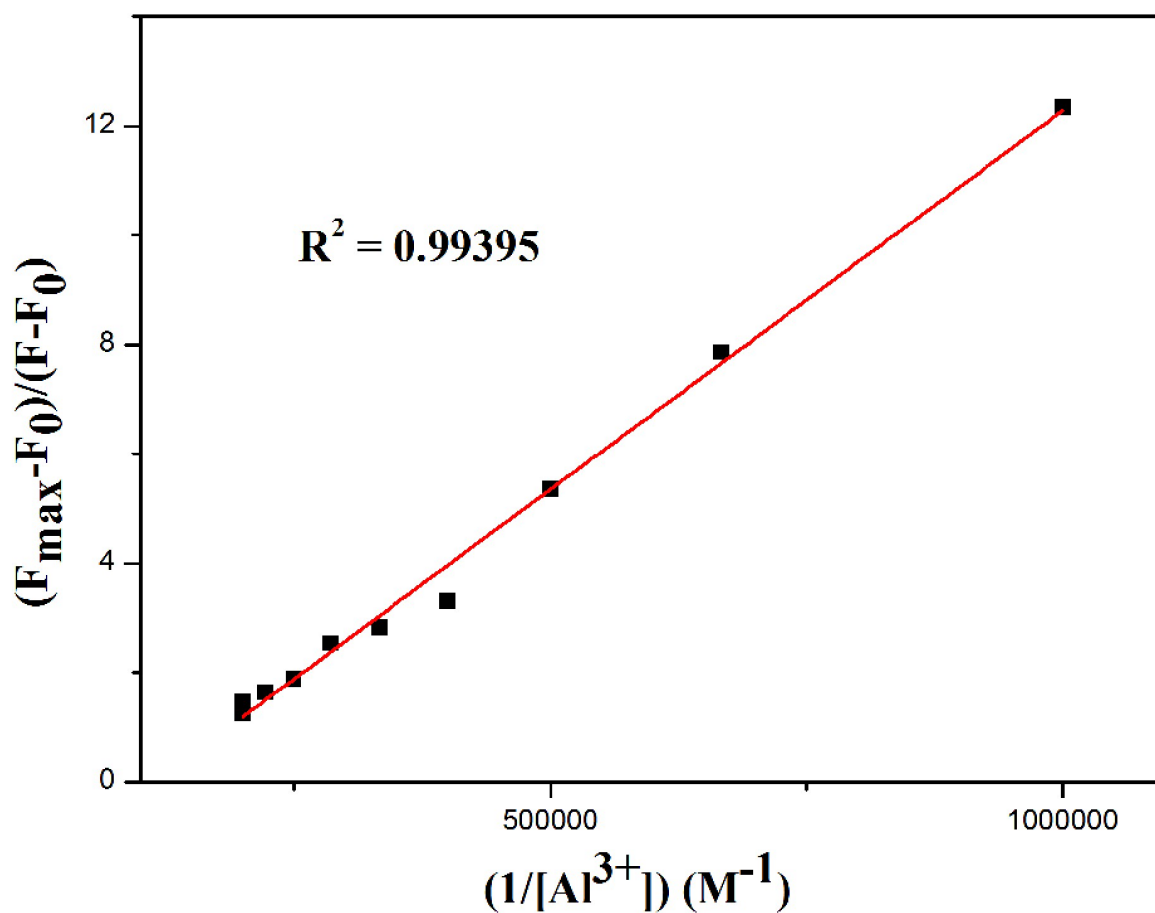

Fig. S5 Benesi-Hildebrand analysis of the emission changes for the complexation between L and  $Al^{3+}$

Table S1

The comparison of the sensor L with some other fluorescence surface sensors for the measurement of  $Al^{3+}$ .

| Fluorescence surface sensor | Excitation wavelength(nm ) | Working media                                     | Detection limit( $\mu\text{mol/L}$ ) |
|-----------------------------|----------------------------|---------------------------------------------------|--------------------------------------|
| [37]                        | 364                        | CH <sub>3</sub> OH                                | 7.41                                 |
| [38]                        | 330                        | C <sub>2</sub> H <sub>5</sub> OH/H <sub>2</sub> O | 7.35                                 |
| [39]                        | 375                        | CH <sub>3</sub> OH                                | 0.525                                |
| [40]                        | 353                        | CH <sub>3</sub> OH                                | 0.5                                  |
| [41]                        | 370                        | CH <sub>3</sub> CN/H <sub>2</sub> O               | 15.6                                 |
| The Sensor L                | 373                        | CH <sub>3</sub> OH                                | 0.12                                 |
